# Supplementary material
Source: bioRxiv or medRxiv preprint supplement (https://medrxiv.org/content/medrxiv/early/2022/07/25/2022.07.24.22277978/DC1/embed/media-1.pdf)
Supplement: Supplementary file [file media-1.pdf]

## Supplemental Tables

**Supplemental Table 1. Log marginal likelihood values calculated via stepping-stone and path-sampling for different coalescent models under a strict molecular clock.** The results favor the use of a non-parametric Skygrid coalescent model.

| <b>Dataset</b> | <b>Tree Prior</b> | <b>Stepping-Stone</b> | <b>Path-Sampling</b> |
|----------------|-------------------|-----------------------|----------------------|
| Minnesota-only | Skygrid           | -9974.71              | -9970.7              |
| Minnesota-only | Constant          | -10395.12             | -10388.44            |
| International  | Skygrid           | -14926.81             | -14917.62            |
| International  | Constant          | -15556.77             | -15545.55            |

**Supplemental Table 2. Bayes factor and posterior probability values for support of non-zero SARS-CoV-2 transmission of Minnesota counties that met our *a priori* threshold > 100.** We list the forty-three routes out of 380 in this category. Hennepin was most often included as the origin (19/43) and destination (10/43).

| <b>From</b> | <b>To</b>   | <b>Bayes Factor</b> | <b>Posterior Probability</b> |
|-------------|-------------|---------------------|------------------------------|
| Anoka       | Hennepin    | 296,377.75          | 1                            |
| Dakota      | Hennepin    | 296,377.75          | 1                            |
| Hennepin    | Kandiyohi   | 296,377.75          | 1                            |
| Hennepin    | Olmsted     | 296,377.75          | 1                            |
| Hennepin    | Ramsey      | 296,377.75          | 1                            |
| Hennepin    | Rice        | 296,377.75          | 1                            |
| Hennepin    | Saint Louis | 296,377.75          | 1                            |
| Hennepin    | Scott       | 296,377.75          | 1                            |
| Hennepin    | Sherburne   | 296,377.75          | 1                            |
| Hennepin    | Stearns     | 296,377.75          | 1                            |
| Hennepin    | Washington  | 296,377.75          | 1                            |
| Hennepin    | Wright      | 296,377.75          | 1                            |
| Ramsey      | Washington  | 296,377.75          | 1                            |
| Hennepin    | Anoka       | 296,377.75          | 1                            |
| Hennepin    | Benton      | 296,377.75          | 1                            |
| Stearns     | Benton      | 296,377.75          | 1                            |
| Hennepin    | Blue Earth  | 296,377.75          | 1                            |
| Hennepin    | Carver      | 296,377.75          | 1                            |
| Hennepin    | Chisago     | 296,377.75          | 1                            |
| Hennepin    | Crow Wing   | 296,377.75          | 1                            |
| Hennepin    | Dakota      | 296,377.75          | 1                            |
| Hennepin    | Goodhue     | 296,377.75          | 1                            |
| Ramsey      | Hennepin    | 296,377.75          | 1                            |
| Saint Louis | Hennepin    | 296,377.75          | 1                            |

|            |            |            |      |
|------------|------------|------------|------|
| Stearns    | Hennepin   | 296,377.75 | 1    |
| Stearns    | Sherburne  | 296,377.75 | 1    |
| Dakota     | Washington | 16,448.15  | 1    |
| Olmsted    | Hennepin   | 14,095.80  | 1    |
| Ramsey     | Anoka      | 8,963.40   | 1    |
| Ramsey     | Dakota     | 3,101.66   | 0.99 |
| Washington | Hennepin   | 3,069.16   | 0.99 |
| Hennepin   | Clay       | 2,011.81   | 0.99 |
| Kandiyohi  | Hennepin   | 1,715.01   | 0.99 |
| Stearns    | Crow Wing  | 828.55     | 0.98 |
| Dakota     | Ramsey     | 658.41     | 0.97 |
| Anoka      | Dakota     | 626.04     | 0.97 |
| Crow Wing  | Hennepin   | 449.94     | 0.96 |
| Anoka      | Wright     | 373.24     | 0.95 |
| Olmsted    | Goodhue    | 315.48     | 0.95 |
| Anoka      | Chisago    | 222.09     | 0.92 |
| Sherburne  | Chisago    | 154.43     | 0.89 |
| Anoka      | Sherburne  | 120.27     | 0.87 |
| Benton     | Hennepin   | 104.33     | 0.85 |

# Supplemental Figures

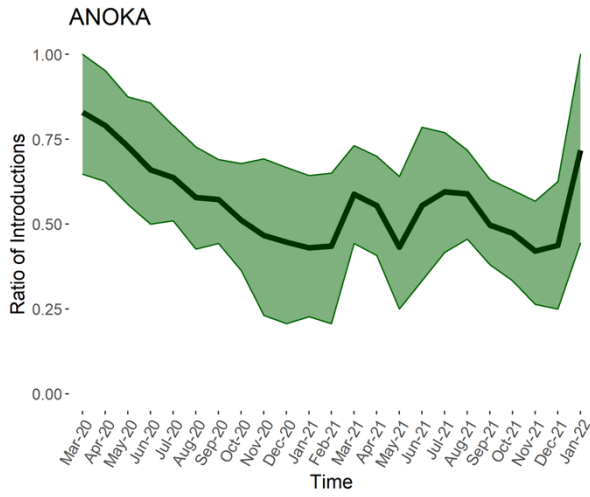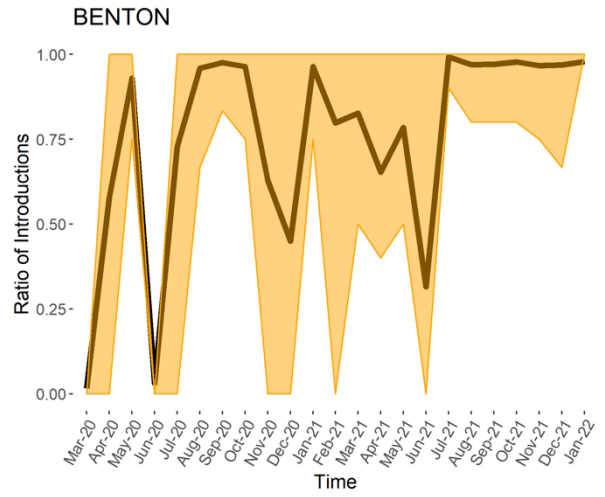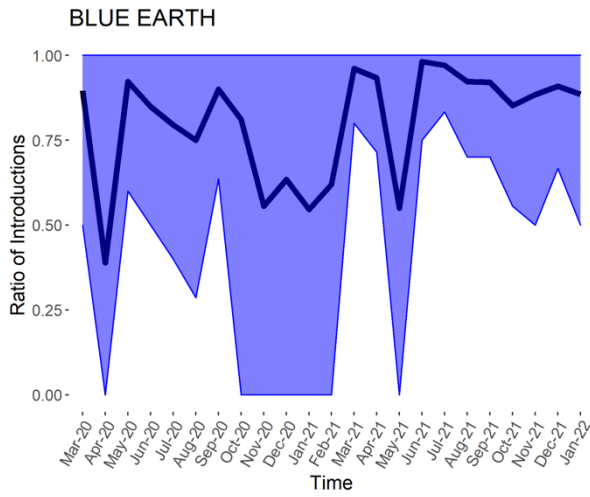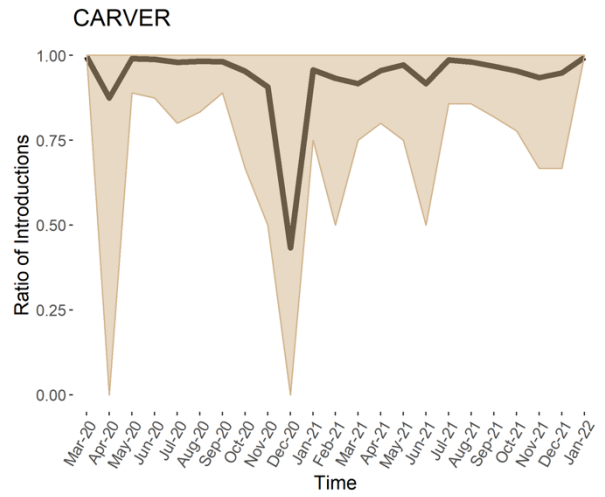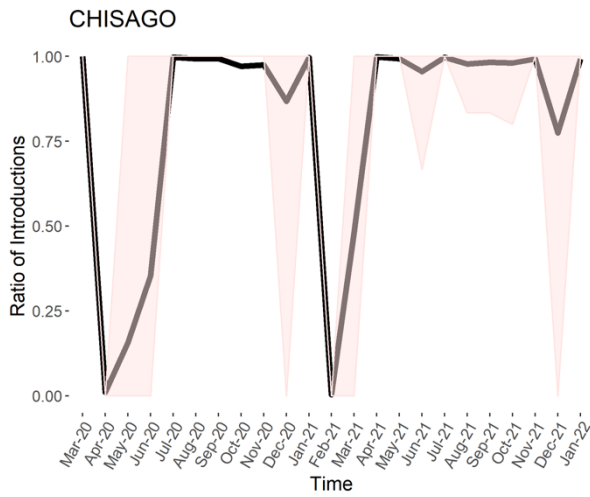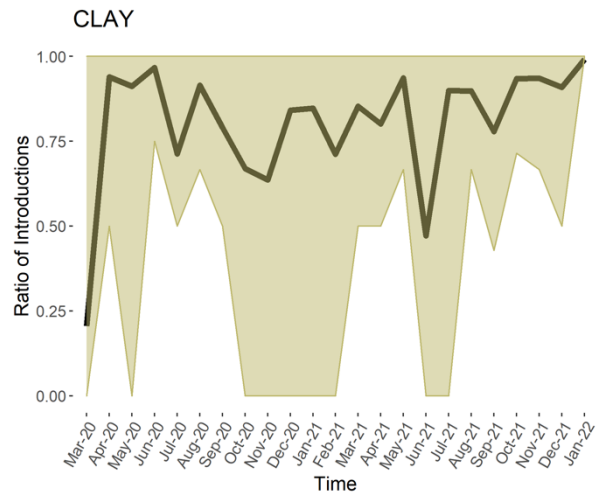

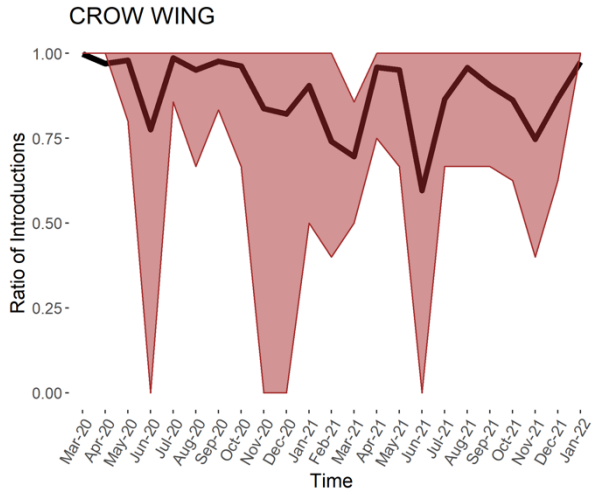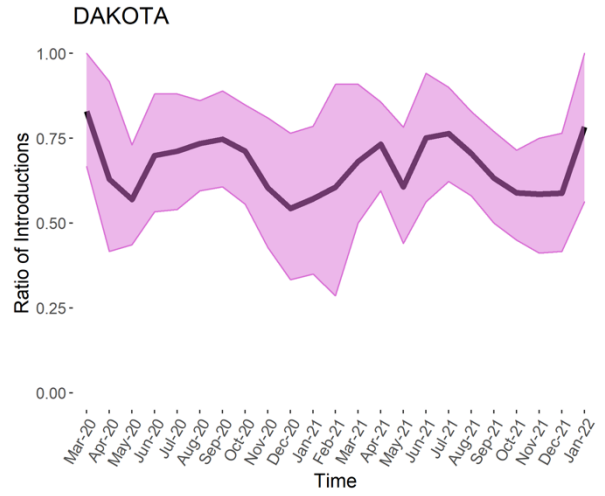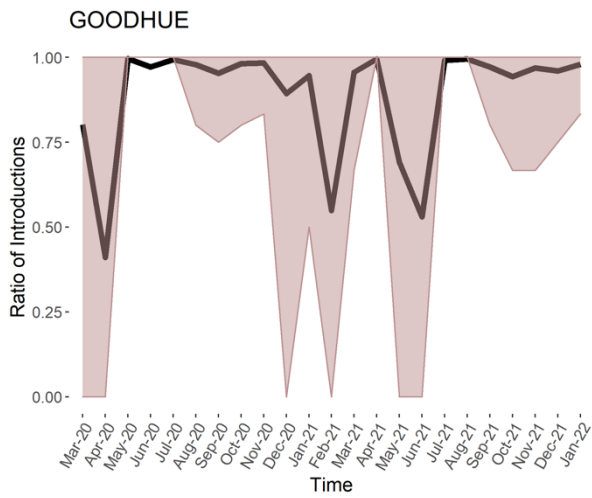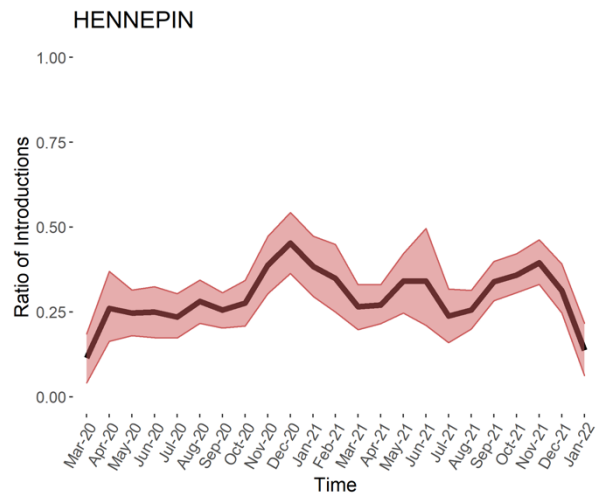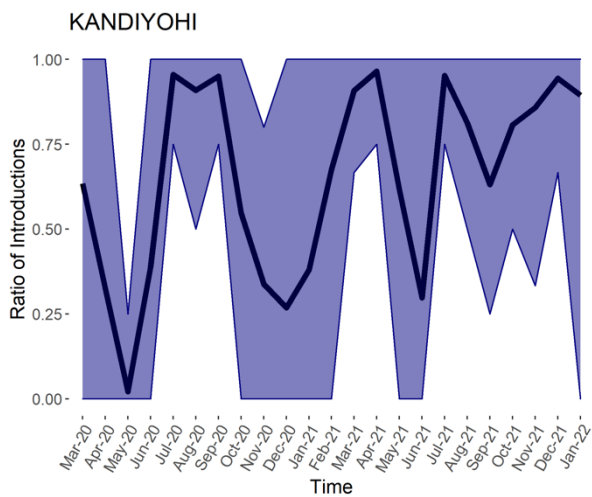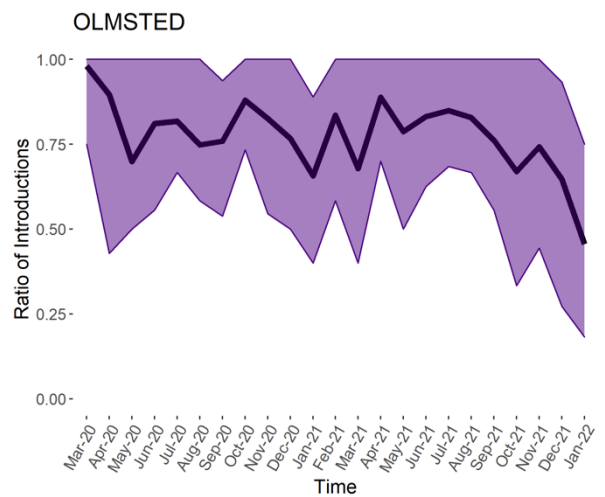

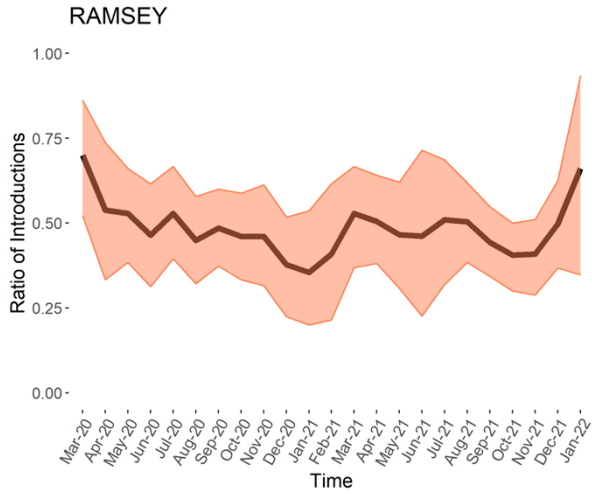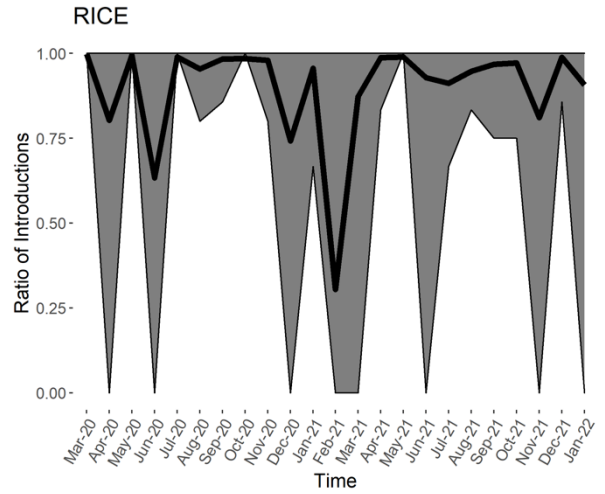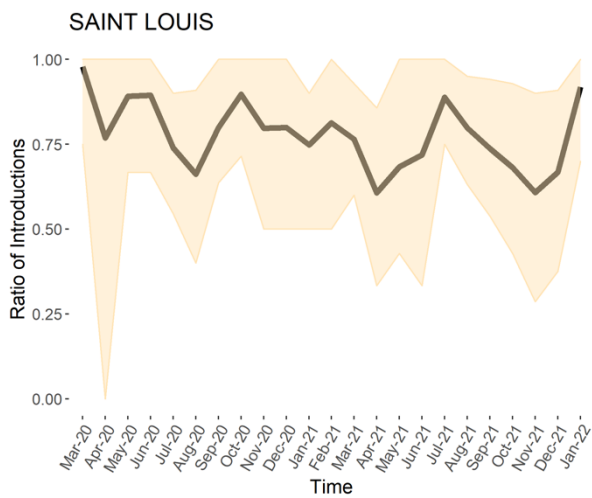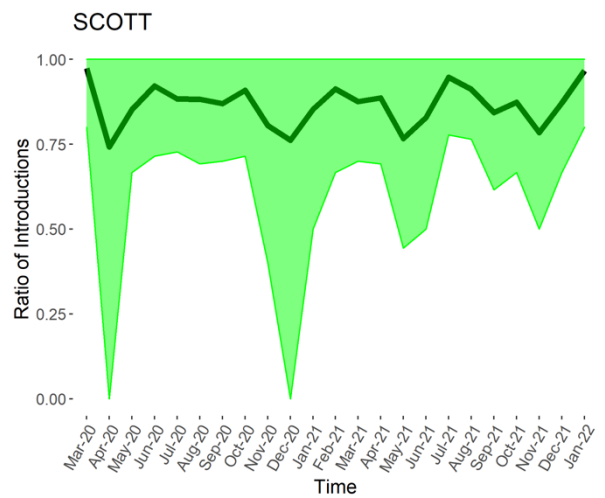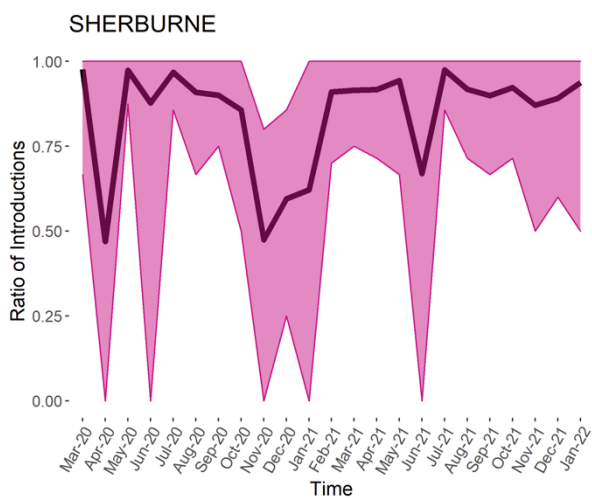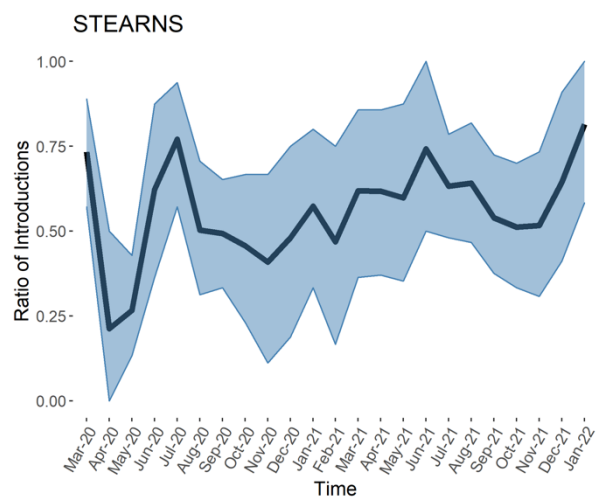

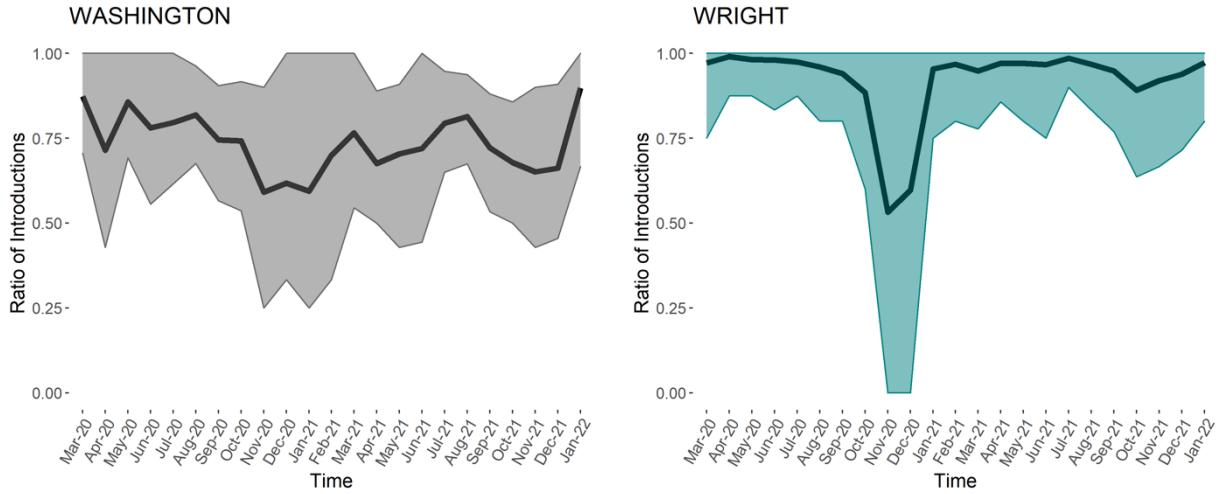

**Supplemental Fig. 1. Ratio of introductions to total viral flow into and out of the respective county by month for each county from March 2020 – January 2022.** We show the posterior mean ratio and 95% Bayesian highest posterior density interval. Many of the counties contain uncertainty around the median ratio given their limited number of sequences.

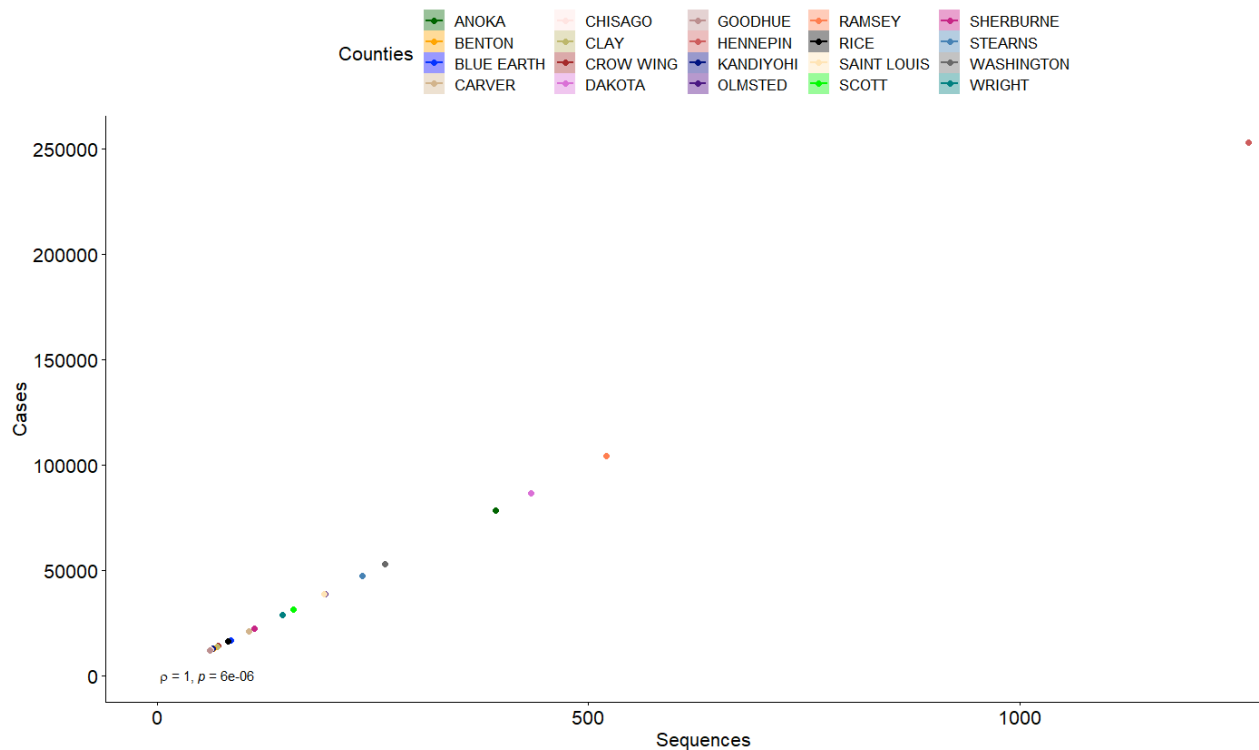

**Supplemental Fig. 2. Correlation between subsampled counties sequences and COVID-19 cases.** Correlation coefficient via Spearman's Rho ( $\rho = 1$ ).

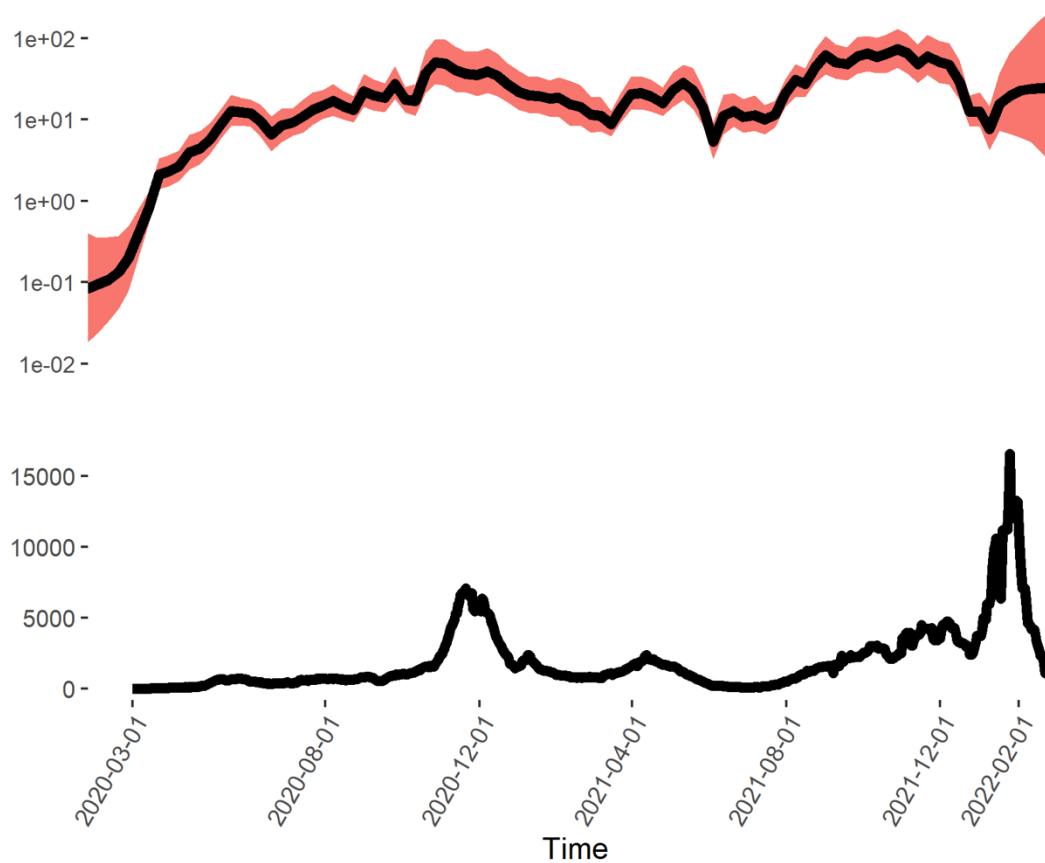

**Supplemental Fig. 3. Effective population size of SARS-CoV-2 and confirmed cases in Minnesota.** A) Bayesian Skygrid plot of effective population size over time of SARS-CoV-2 in Minnesota. The line represents the median value while the shaded region is the 95% Bayesian highest posterior density region. B) Seven-day rolling average of confirmed cases of COVID-19 in Minnesota <sup>1</sup>.

## References

1. Mullen JL, *et al.* outbreak.info. **May 1**, (2020).
